# Supplementary material
Source: MDPI journal article supplement (https://www.mdpi.com/2076-3417/11/17/7768)
Supplement: s1 [file s1]

Archive with 4 entries (4 files):
- Supplementary Materials.pdf
- Video S1 the beating cardiomyocytes after 7 days cultured on COLL-gel.mp4
- Video S2 the beating cardiomyocytes after 7 days cultured on pDSIS-gel.mp4
- Video S3 the beating cardiomyocytes after 7 days cultured on pDMYO-gel.mp4
