# Supplementary material
Source: MDPI journal article supplement (https://www.mdpi.com/2076-3417/11/17/7768)
Supplement: s1 [file s1 › Supplementary Materials.pdf]

## **Supplementary Materials**

**The different effect of decellularized myocardial matrix hydrogel and decellularized small intestinal submucosa matrix hydrogel on cardiomyocytes and ischemic heart**

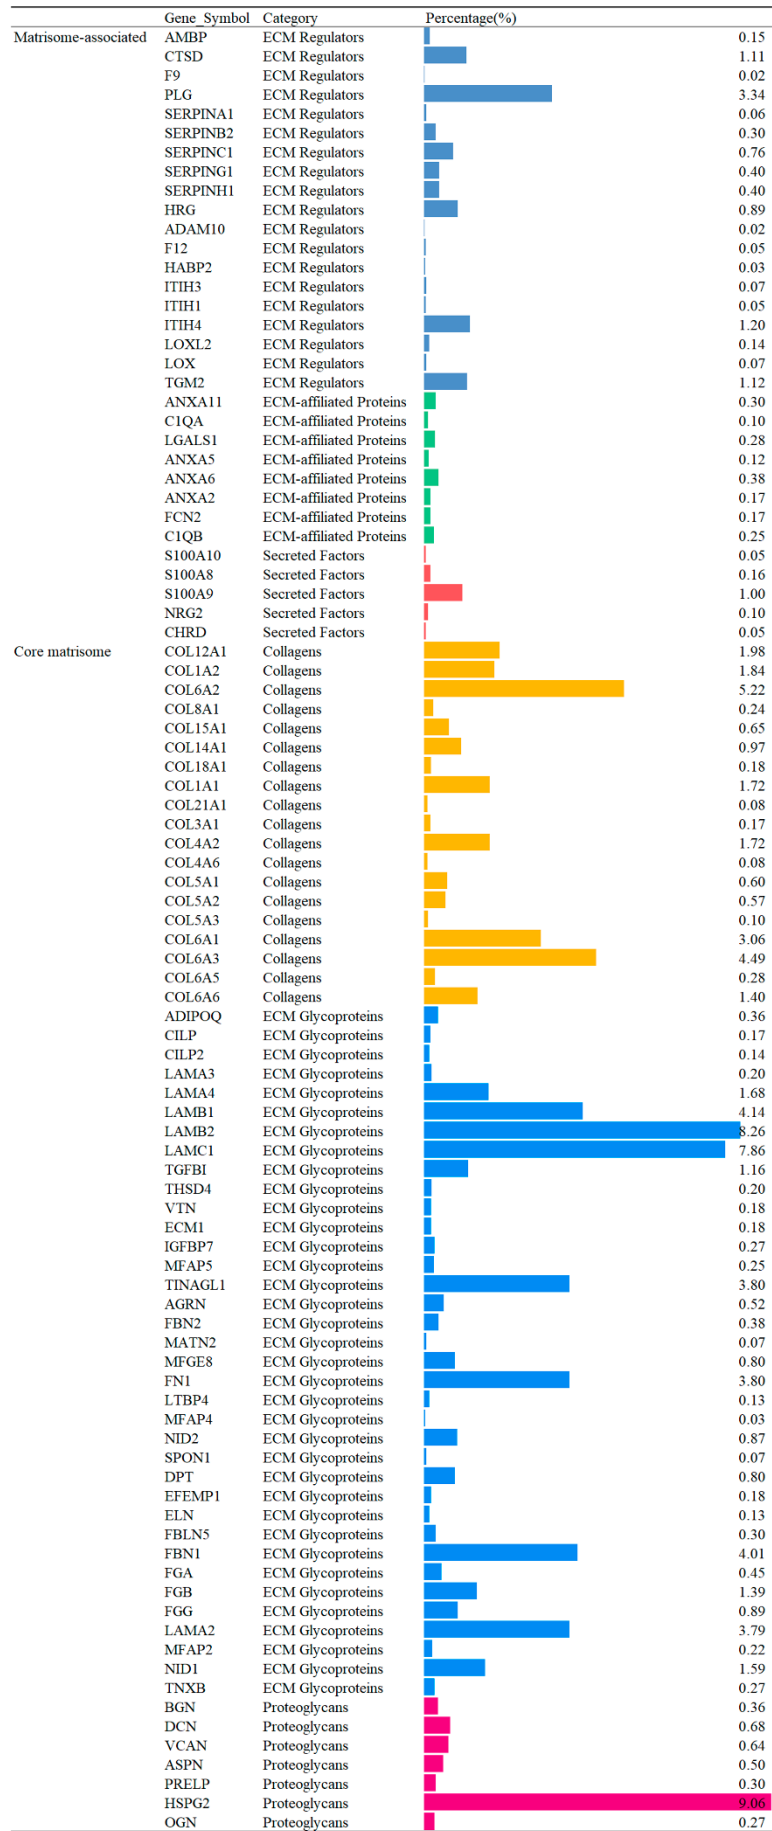

**Figure S1** Gene symbol and relative content of matrisome subgroup proteins of pDMYO matrix

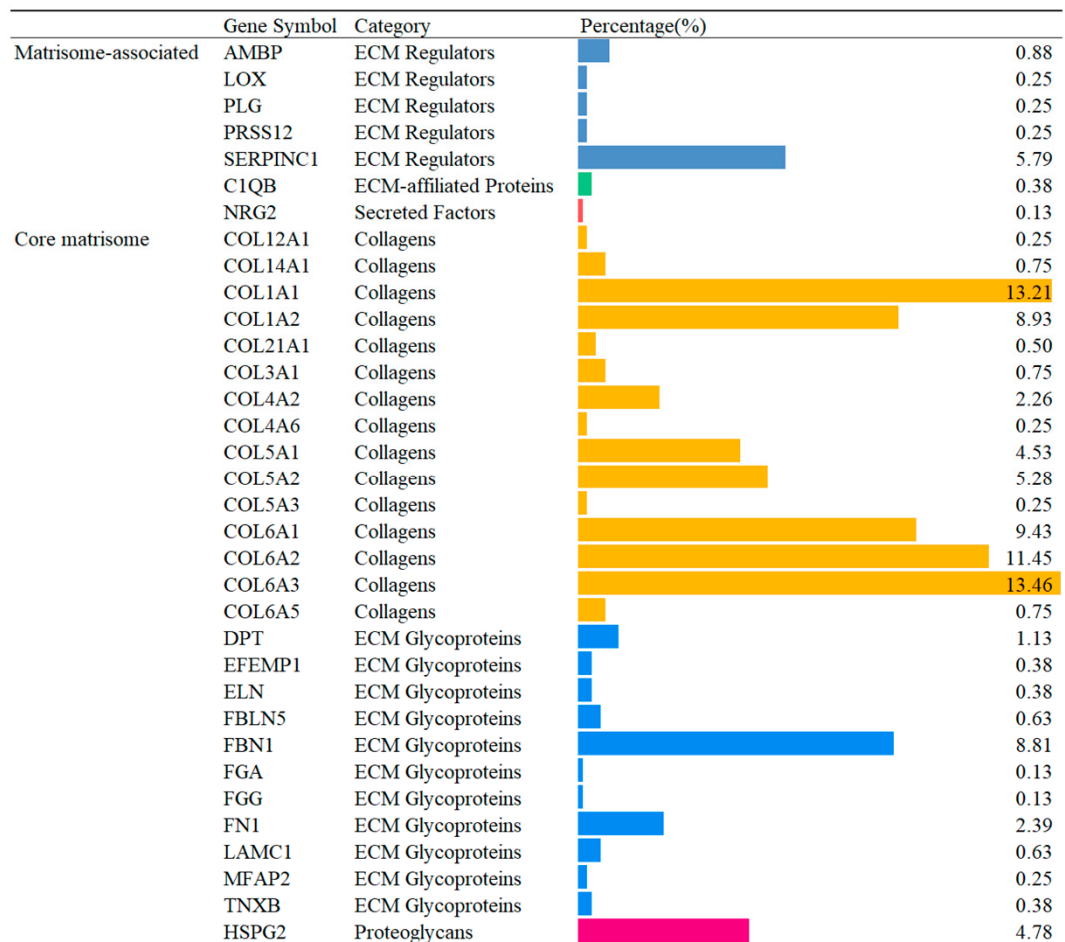

**Figure S2** Gene symbol and relative content of matrisome subgroup proteins of pDSIS matrix

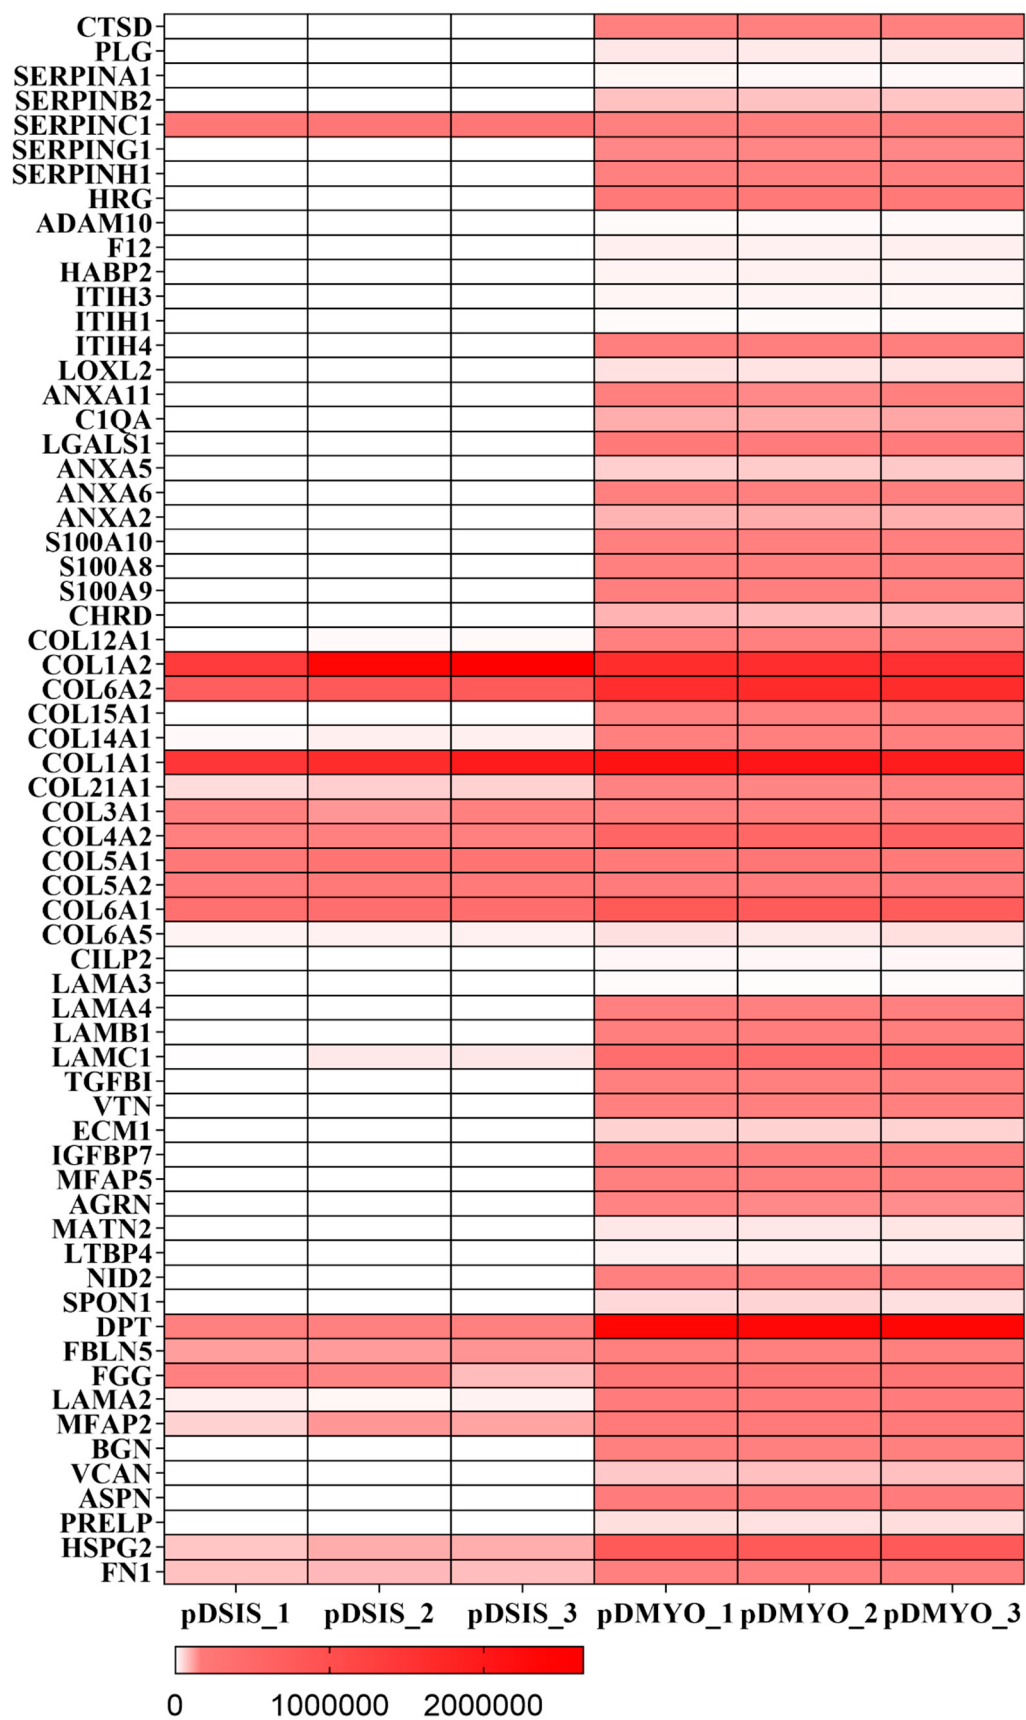

Figure S3 the relative abundance of proteins in pDMYO and pDSIS

**Video S1: the beating cardiomyocytes after 7 days cultured on COLL-gel**

**Video S2: the beating cardiomyocytes after 7 days cultured on pDSIS-gel**

**Video S3: the beating cardiomyocytes after 7 days cultured on pDMYO-gel**
